# Supplementary material
Source: Springer Nature journal article supplement (https://www.springermedizin.de/resource/supplementary/12889_2010_2071_MOESM1_ESM.pdf/9484504)
Supplement: MOESM1 [file 9484504]

All Diagnostic Centres (RHC/THQ) which consent to participate  
Stratify by rural and urban setting

Using stratified randomisation, allocate 33 Diagnostic Centres to the two intervention and one control arms (11 to each)

**Intervention Arm 1**

Training for healthcare staff including brief psychological intervention + desktop guides + leaflets + treatment packages

**Intervention Arm 2**

Training for healthcare staff including brief psychological intervention + desktop guides + leaflets

**Control Arm**

Leaflets

In each Diagnostic Centre check eligibility criteria for consecutive attendees  $\geq 18$  years of age; smoker; TB suspect (cough for  $\geq 3$  weeks)  
If eligible, information regarding project and Consent

**Intervention Arm 1**

Five Steps to Quit programme including brief psychological intervention and therapeutic option

**Intervention Arm 2**

Five Steps to Quit programme including brief psychological intervention but without therapeutic option

**Control Arm**

Usual care + leaflets

Review at 1 and 6 months to assess smoking status and clinical outcomes; In-depth interviews with sub-set of subjects
